# Supplementary material for: A comparison of mRNA and circRNA expression between squamous cell carcinoma and adenocarcinoma of the lungs
Source: PubMed Central journal article supplement (PMC7654371; doi:10.1590/1678-4685-gmb-2020-0054), 2020-11-06
Supplement: 1415-4757-GMB-43-4-e20200054-s1.pdf [file 1415-4757-GMB-43-4-e20200054-s1.pdf]

**Supplementary Material to “A comparison of mRNA and circRNA expression between squamous cell carcinoma and adenocarcinoma of the lungs.”**

**Table S1** - The clinical characteristics of included patients

| Type | NO. | Gender | Age | Smoking history   | TNM      | Stage | Adjuvant therapy |
|------|-----|--------|-----|-------------------|----------|-------|------------------|
| LUSC | 1   | F      | 71  | None              | PT3N2M0  | IIIA  | NO               |
| LUAD | 2   | M      | 69  | None              | pT3N1M1  | IVB   | NO               |
| LUSC | 3   | M      | 50  | 20 years (20/day) | pT2N0M0  | IB    | NO               |
| LUSC | 4   | M      | 51  | 30 years (20/day) | PT3N2M0  | IIIA  | NO               |
| LUAD | 5   | F      | 71  | <400/year         | T2aN0M0  | Ib    | NO               |
| LUSC | 6   | M      | 67  | None              | T3N2M0   | IIIA  | NO               |
| LUAD | 7   | M      | 69  | A little          | pT2aN0M0 | Ib    | NO               |
| LUSC | 8   | F      | 57  | 30 years (20/day) | T3N1M0   | IIIA  | NO               |
| LUAD | 9   | M      | 69  | 30 years (30/day) | pT2N2M0  | IIIA  | NO               |
| LUAD | 10  | F      | 54  | None              | pT2aN1M0 | IB    | NO               |
| LUAD | 11  | F      | 55  | None              | pT2N0M0  | IB    | NO               |

| <b>Type</b> | <b>NO.</b> | <b>Gender</b> | <b>Age</b> | <b>Smoking history</b> | <b>TNM</b> | <b>Stage</b> | <b>Adjuvant therapy</b> |
|-------------|------------|---------------|------------|------------------------|------------|--------------|-------------------------|
| LUAD        | 12         | F             | 58         | None                   | pT2N1M0    | IIB          | NO                      |
| LUAD        | 13         | M             | 68         | 20 years (20/day)      | pT2N0M0    | IB           | NO                      |
| LUAD        | 14         | M             | 60         | 30 years (10/day)      | pT3N2M0    | IIIA         | NO                      |
| LUAD        | 15         | F             | 61         | 40 years (40/day)      | pT3N1M0    | IIB          | NO                      |
| LUAD        | 16         | M             | 65         | 40 years (20/day)      | pT3N2M0    | IIIA         | NO                      |
| LUAD        | 17         | F             | 73         | None                   | pT3N2M0    | IIIA         | NO                      |
| LUSC        | 18         | M             | 60         | 20years (20/day)       | pT3N2M0    | IIIA         | NO                      |
| LUSC        | 19         | M             | 61         | 30years (10/day)       | pT3N2M0    | IIIA         | NO                      |
| LUSC        | 20         | F             | 70         | None                   | pT3N1M0    | IIB          | NO                      |
