# Supplementary material for: A comparison of mRNA and circRNA expression between squamous cell carcinoma and adenocarcinoma of the lungs
Source: PubMed Central journal article supplement (PMC7654371; doi:10.1590/1678-4685-gmb-2020-0054), 2020-11-06
Supplement: 1415-4757-GMB-43-4-e20200054-s4.pdf [file 1415-4757-GMB-43-4-e20200054-s4.pdf]

**Supplementary Material to “A comparison of mRNA and circRNA expression between squamous cell carcinoma and adenocarcinoma of the lungs.”**

**Table S4** - The differentially expressed genes related to prognosis

| LUSC          |            | LUAD          |           |
|---------------|------------|---------------|-----------|
| Gene          | Pvalue     | Gene          | Pvalue    |
| <b>STXBP1</b> | 0.00428695 | IRX5          | 1.55E-05  |
| EPHA2         | 0.00813035 | MTURN         | 0.0002359 |
| ADD3          | 0.01073184 | OGT           | 0.0004993 |
| SLC9A9        | 0.01099923 | <b>PMEPA1</b> | 0.0015137 |
| EVA1A         | 0.01130279 | IGF2BP3       | 0.0020889 |
| SHANK2        | 0.0119727  | DCUN1D1       | 0.0052575 |
| FAM46A        | 0.02016478 | DIP2B         | 0.0077857 |
| <b>PMEPA1</b> | 0.03070171 | <b>STXBP1</b> | 0.0129428 |
| NAV2          | 0.04797483 | TMEM243       | 0.0143325 |
|               |            | IGF2BP2       | 0.0204467 |
|               |            | WFDC2         | 0.0207173 |
|               |            | CAPN3         | 0.0269737 |
|               |            | PARM1         | 0.0317552 |
|               |            | PDCD10        | 0.0345579 |
|               |            | PARL          | 0.0355587 |
|               |            | ARRDC3        | 0.0365931 |
|               |            | CDK6          | 0.0396845 |
|               |            | DOK4          | 0.0408639 |

| LUSC | LUAD             |
|------|------------------|
|      | CORO1C 0.0437517 |
|      | WSB1 0.0444235   |
|      | ERRFI1 0.0461206 |
|      | PTPRG 0.048331   |

The bold part is the prognostic genes associated with both LUSC and LUAD.
